# Supplementary material for: Draft genome of Bugula neritina, a colonial animal packing powerful symbionts and potential medicines
Source: PubMed Central journal article supplement (PMC7576161; doi:10.1038/s41597-020-00684-y), 2020-10-20
Supplement: 41597_2020_684_MOESM1_ESM.pdf [file 41597_2020_684_MOESM1_ESM.pdf]

Table of contents

Supplemental Data 1 (PreQC results).....2  
Supplemental Table 1 (Repeat content).....6

# Supplemental Data 1. SGA Preqc Results.

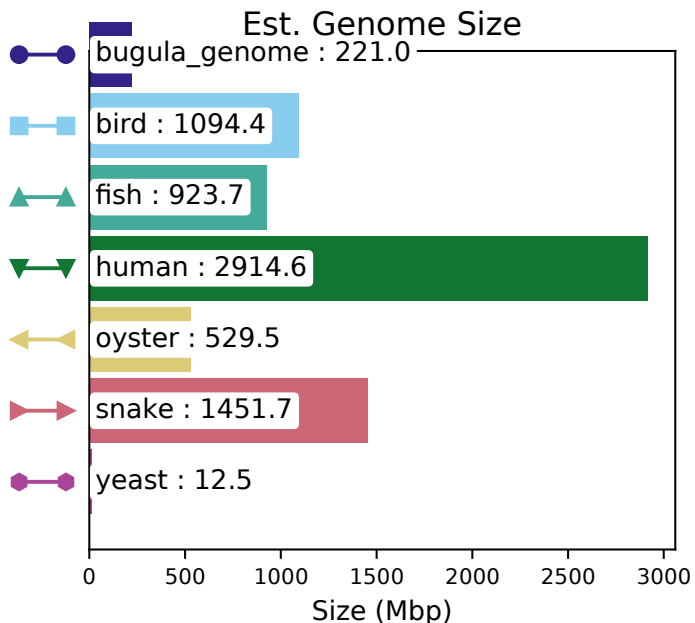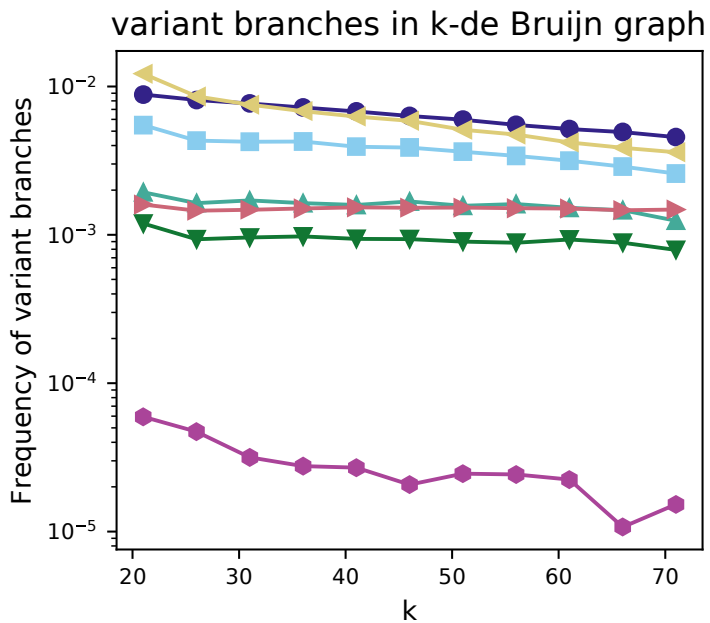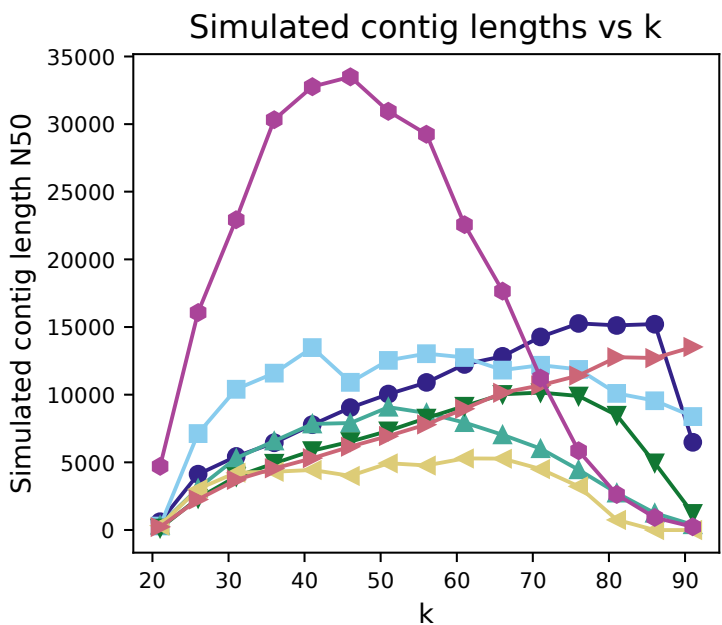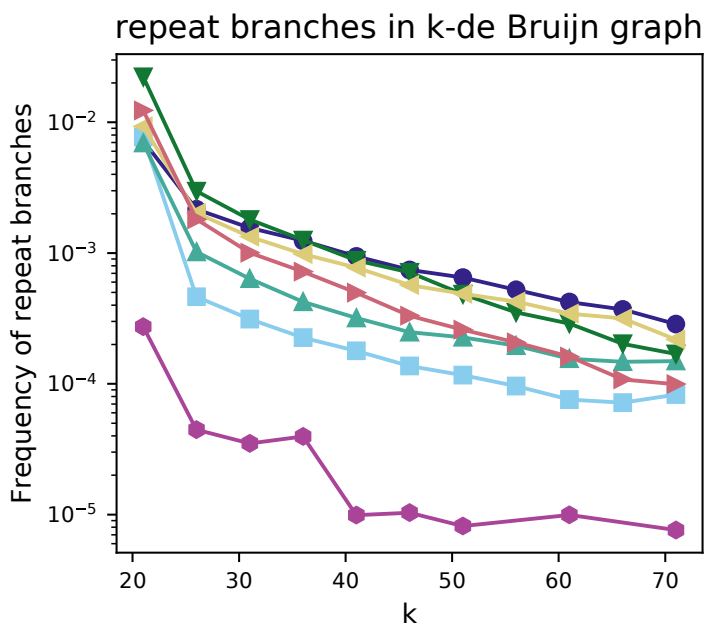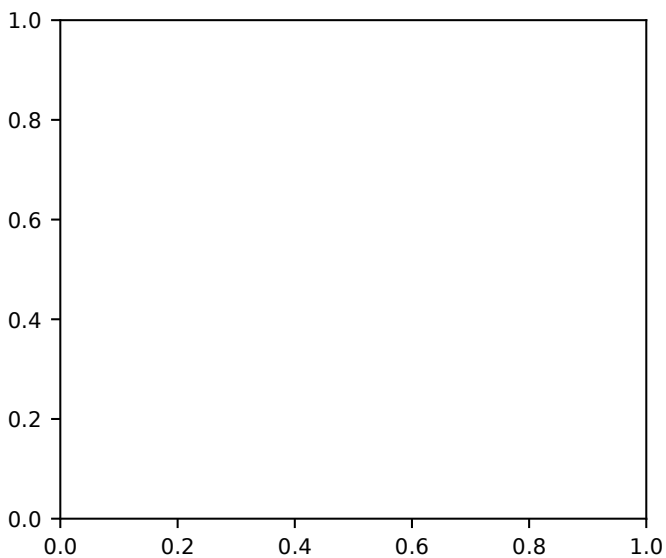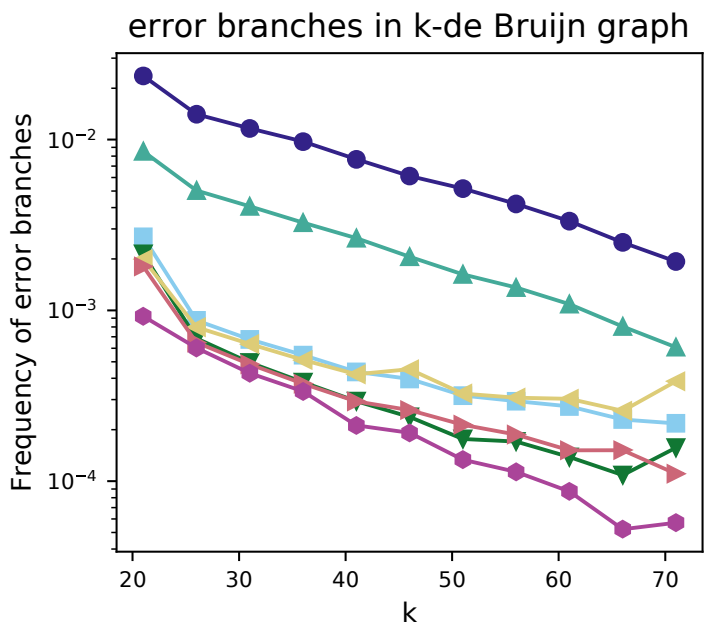

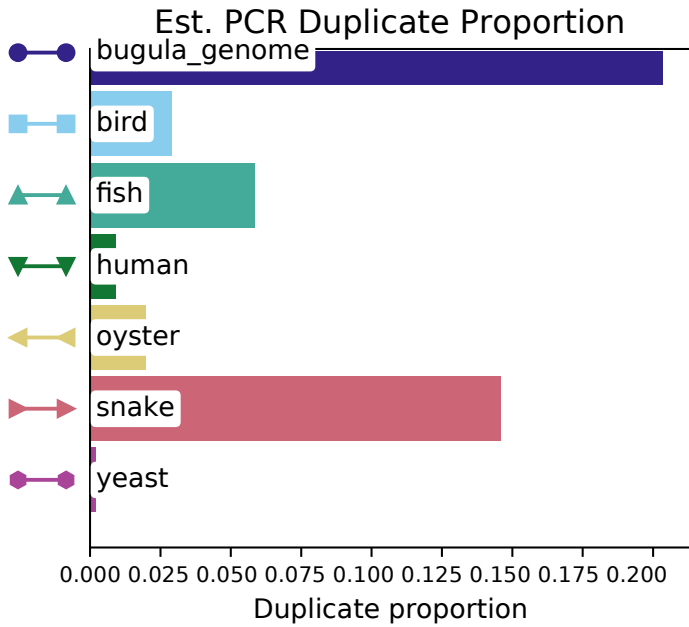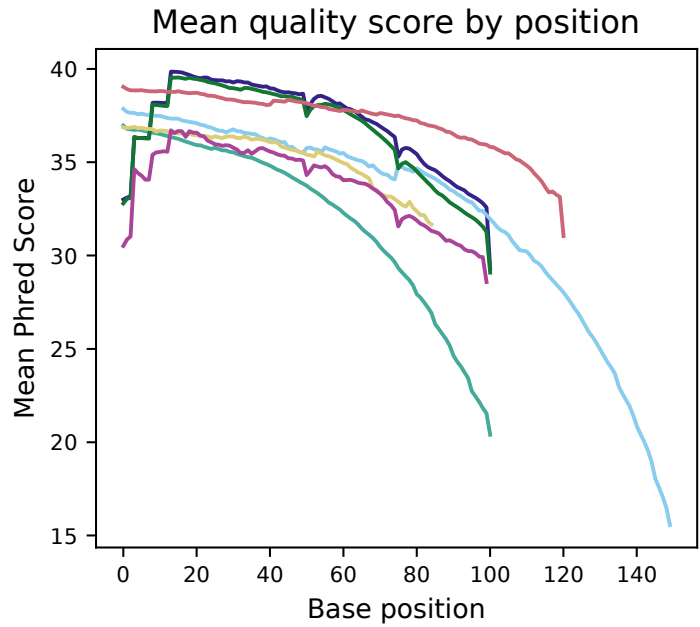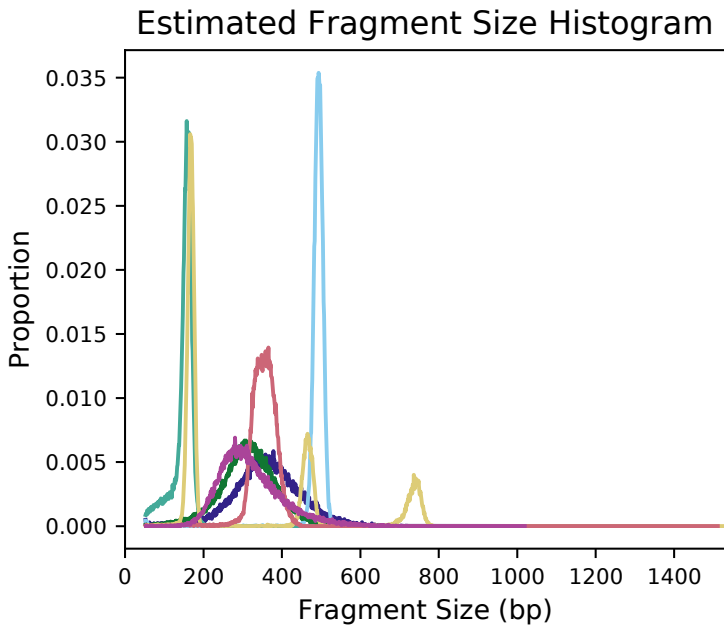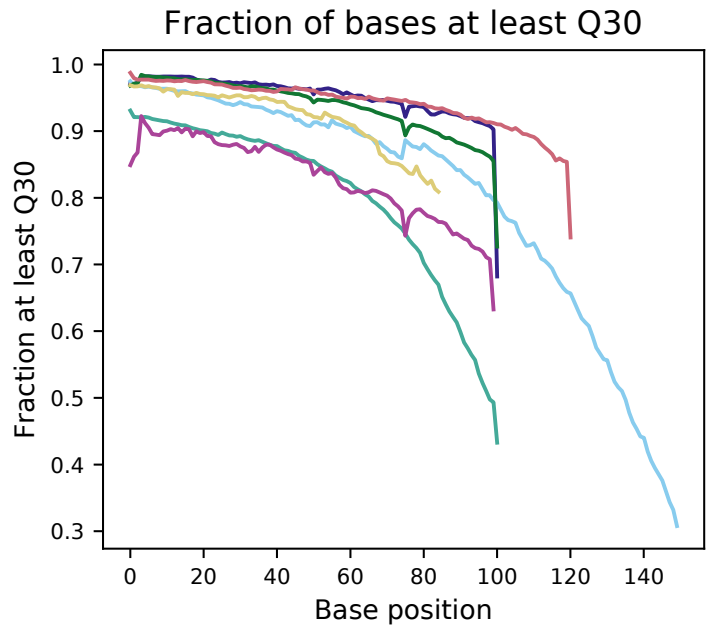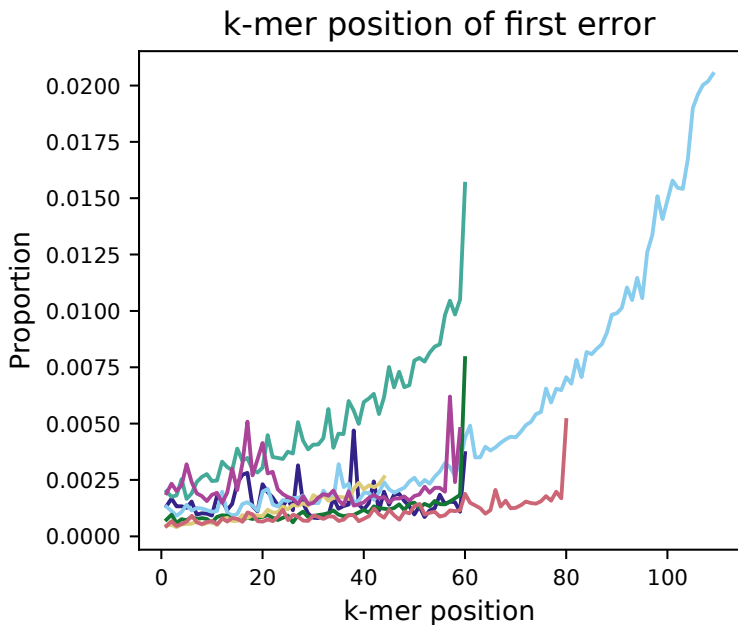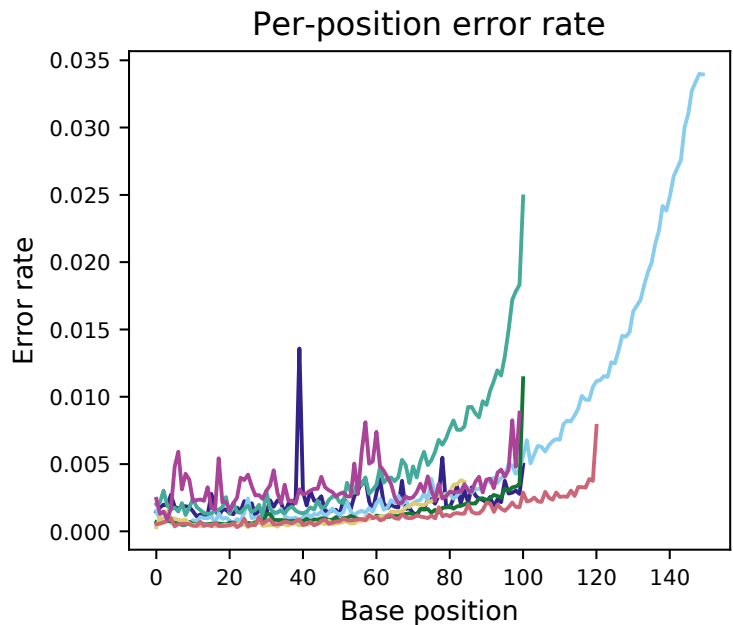

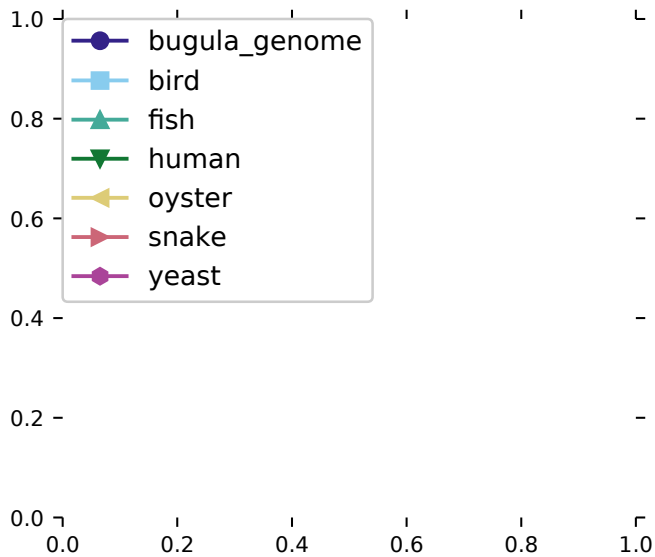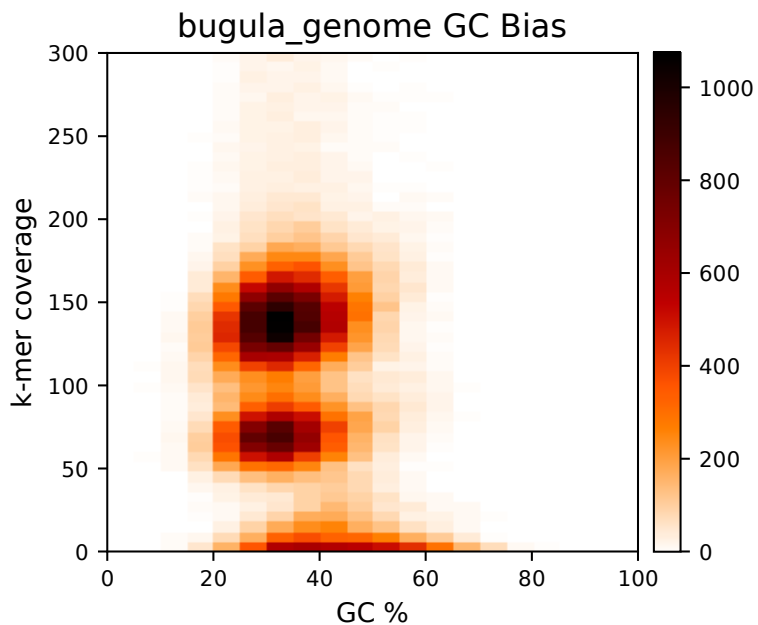

### 51-mer count distribution

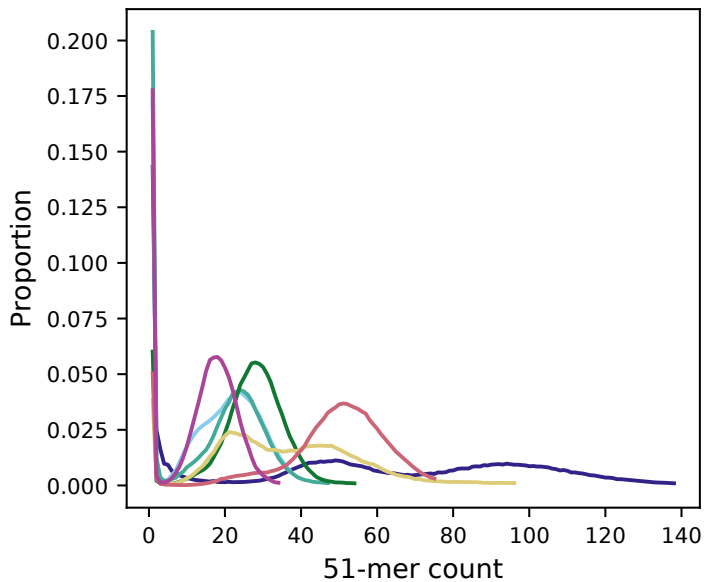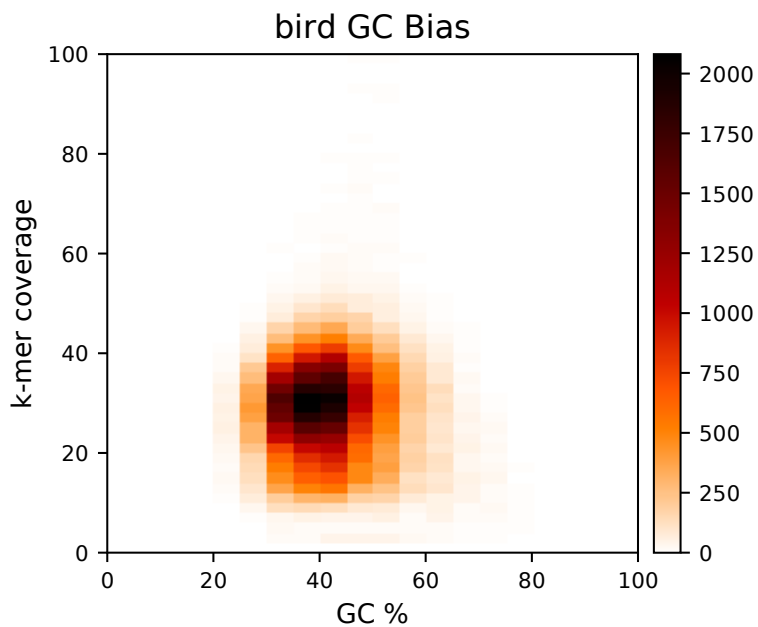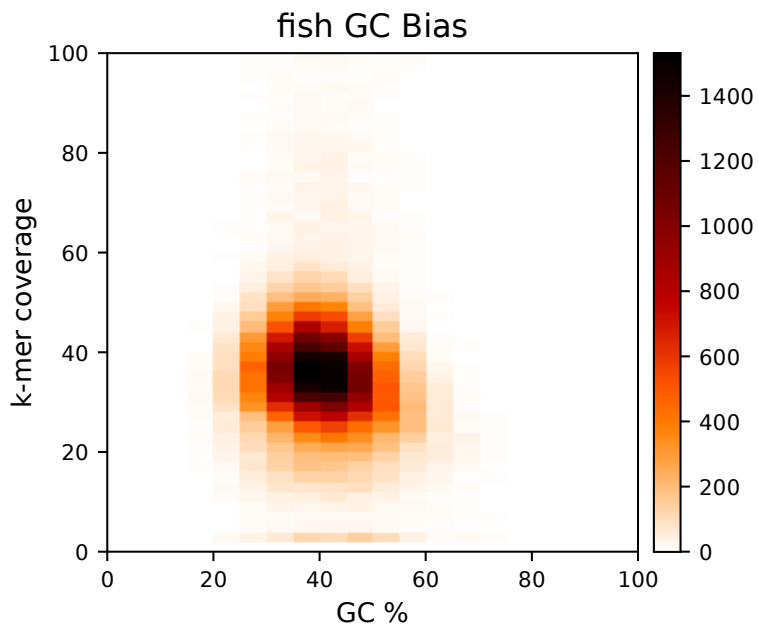

human GC Bias

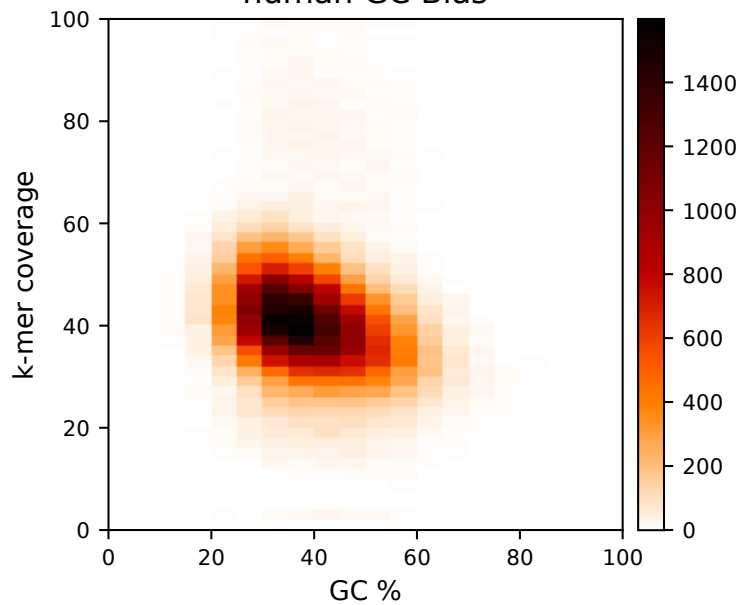

oyster GC Bias

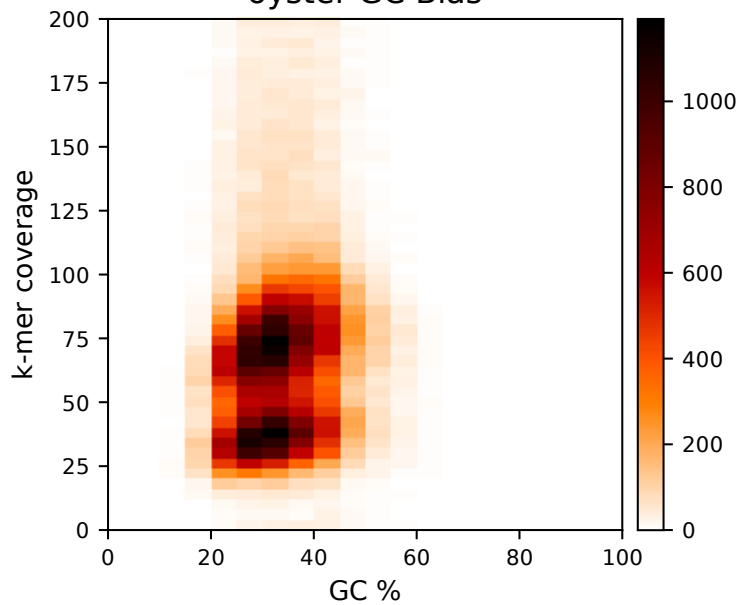

snake GC Bias

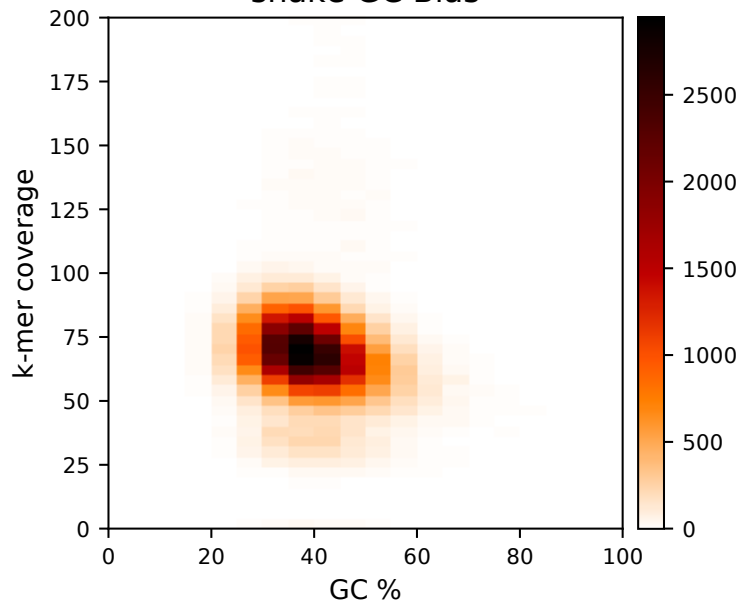

yeast GC Bias

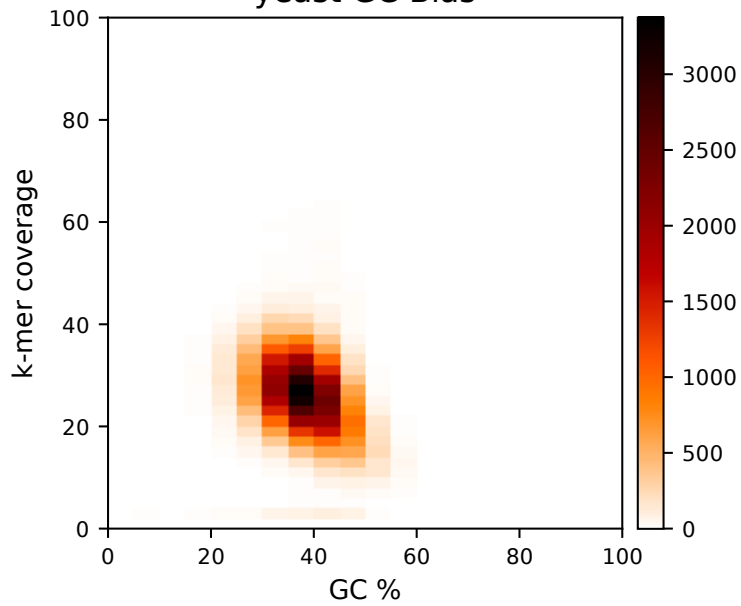

Supplemental Table 1. Repeat content of the *B.neritina* genome

```

=====
sequences:                3547
total length: 214693723 bp (214693723 bp excl N/X-runs)
GC level:                 34.72 %
bases masked: 55542846 bp ( 25.87 %)
=====

```

|                                       | number of<br>elements* | length<br>occupied | percentage<br>of sequence |
|---------------------------------------|------------------------|--------------------|---------------------------|
| -----                                 |                        |                    |                           |
| Retroelements                         | 27447                  | 18300120 bp        | 8.52 %                    |
| SINEs:                                | 46                     | 2112 bp            | 0.00 %                    |
| Penelope                              | 2397                   | 785481 bp          | 0.37 %                    |
| LINEs:                                | 14371                  | 4770421 bp         | 2.22 %                    |
| CRE/SLACS                             | 0                      | 0 bp               | 0.00 %                    |
| L2/CR1/Rex                            | 3895                   | 1796007 bp         | 0.84 %                    |
| R1/LOA/Jockey                         | 0                      | 0 bp               | 0.00 %                    |
| R2/R4/NeSL                            | 793                    | 382779 bp          | 0.18 %                    |
| RTE/Bov-B                             | 2100                   | 1154705 bp         | 0.54 %                    |
| L1/CIN4                               | 5186                   | 651449 bp          | 0.30 %                    |
| LTR elements:                         | 13030                  | 13527587 bp        | 6.30 %                    |
| BEL/Pao                               | 1006                   | 758652 bp          | 0.35 %                    |
| Ty1/Copia                             | 336                    | 311928 bp          | 0.15 %                    |
| Gypsy/DIRS1                           | 9542                   | 12168188 bp        | 5.67 %                    |
| Retroviral                            | 329                    | 83829 bp           | 0.04 %                    |
| DNA transposons                       | 28516                  | 7942958 bp         | 3.70 %                    |
| hobo-Activator                        | 2880                   | 662976 bp          | 0.31 %                    |
| Tc1-IS630-Pogo                        | 1570                   | 565921 bp          | 0.26 %                    |
| En-Spm                                | 0                      | 0 bp               | 0.00 %                    |
| MuDR-IS905                            | 0                      | 0 bp               | 0.00 %                    |
| PiggyBac                              | 0                      | 0 bp               | 0.00 %                    |
| Tourist/Harbinger                     | 0                      | 0 bp               | 0.00 %                    |
| Other (Mirage,<br>P-element, Transib) | 58                     | 27429 bp           | 0.01 %                    |
| Rolling-circles                       | 0                      | 0 bp               | 0.00 %                    |
| Unclassified:                         | 84448                  | 21541525 bp        | 10.03 %                   |
| Total interspersed repeats:           |                        | 47784603 bp        | 22.26 %                   |
| Small RNA:                            | 11631                  | 1882093 bp         | 0.88 %                    |
| Satellites:                           | 0                      | 0 bp               | 0.00 %                    |
| Simple repeats:                       | 68160                  | 5532140 bp         | 2.58 %                    |
| Low complexity:                       | 6521                   | 344010 bp          | 0.16 %                    |
| =====                                 |                        |                    |                           |

\* most repeats fragmented by insertions or deletions  
have been counted as one element.  
Runs of  $\geq 20$  X/Ns in query were excluded in % calcs.  
RepeatMasker Combined Database: Dfam\_3.1
